# Supplementary material for: Solution structure and behaviour of Δ-cis-α-[Ru(R,R-picchxnMe2)(phi)]2+ by NMR spectroscopy and molecular modellingElectronic supplementary information (ESI) available: NMR spectra and selected NMR data. See http://www.rsc.org/suppdata/dt/b2/b208846k/
Source: Royal Society of Chemistry journal article supplement (doi:10.1039/b208846k), 2002-12-17
Supplement: figures1.pdf [file figures1.pdf]

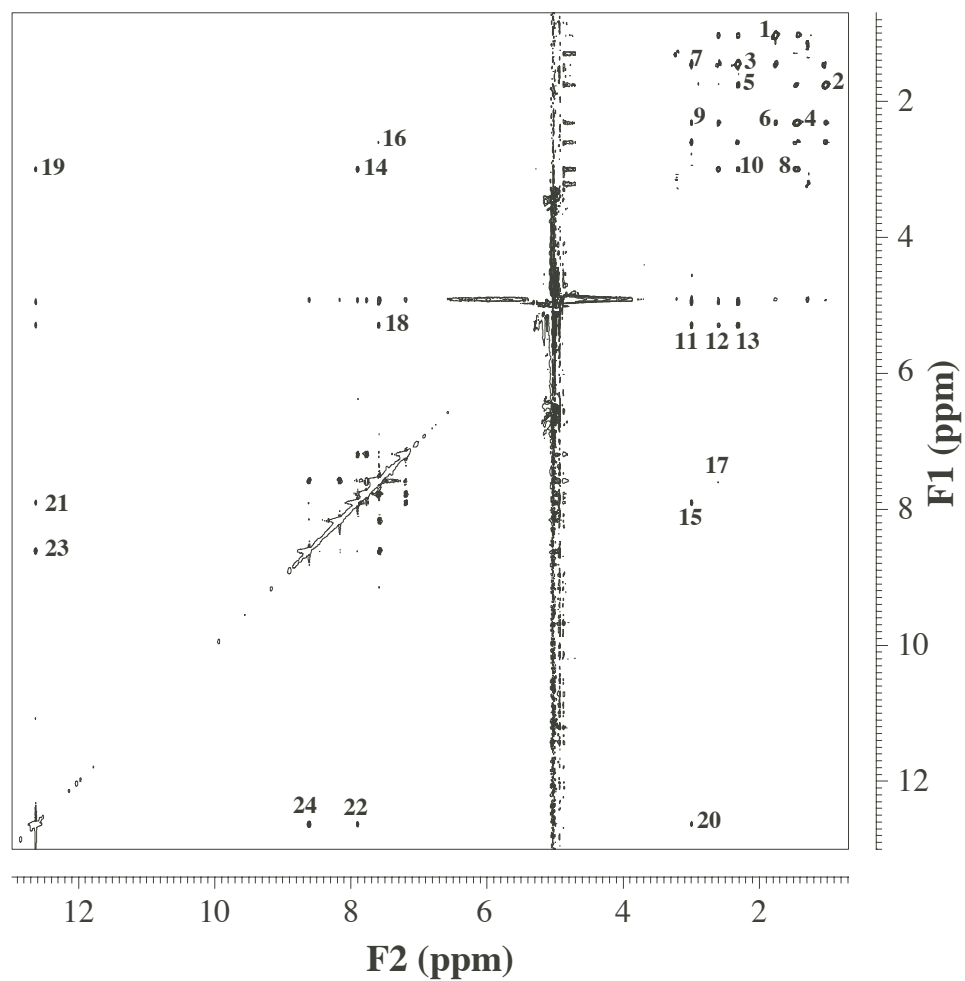

**Figure S1** Watergate compensated ROESY spectrum of  $\alpha$ -phi (2.5 mM, 10% D<sub>2</sub>O, 15 °C,  $\tau_m$  = 30 ms). The numbered ROE cross-peaks correspond to the restraints listed in Table 1.
