# Supplementary material for: Solution structure and behaviour of Δ-cis-α-[Ru(R,R-picchxnMe2)(phi)]2+ by NMR spectroscopy and molecular modellingElectronic supplementary information (ESI) available: NMR spectra and selected NMR data. See http://www.rsc.org/suppdata/dt/b2/b208846k/
Source: Royal Society of Chemistry journal article supplement (doi:10.1039/b208846k), 2002-12-17
Supplement: figures2.pdf [file figures2.pdf]

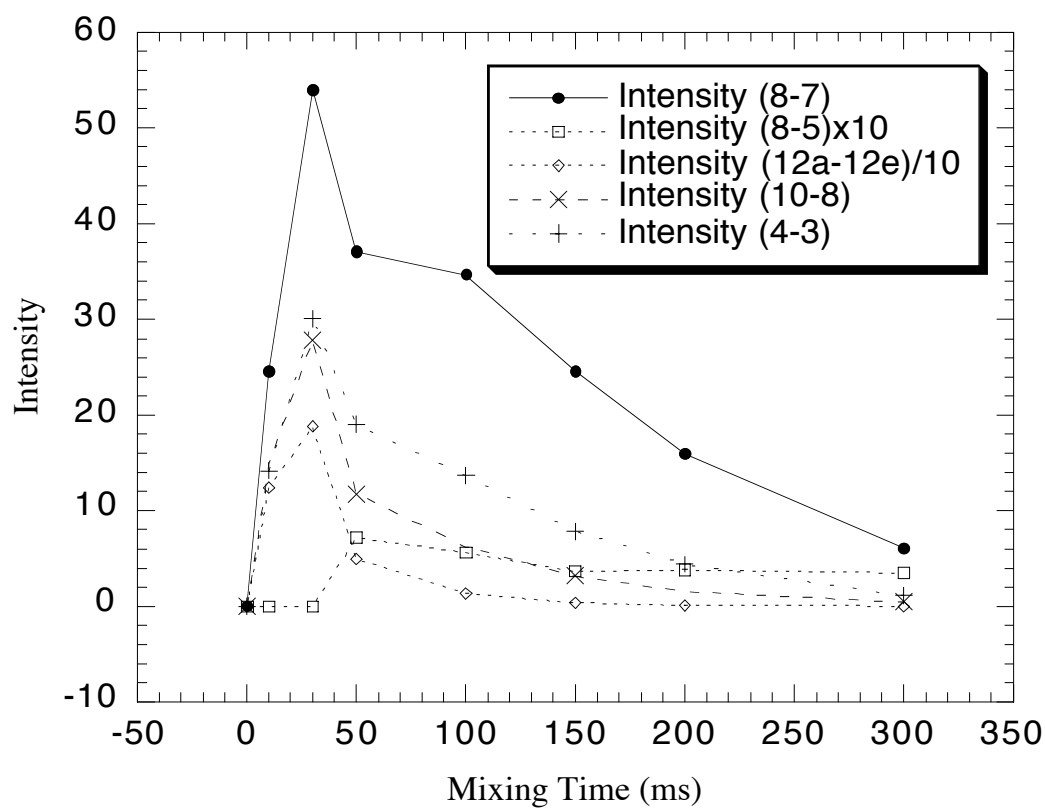

**Figure S2:** ROE build-up line plots for cross-peaks for 25 mM  $\alpha$ -phi. Five representative protons are chosen to show that no evidence of spin diffusion is seen before a mixing time of 50 ms.
